# Supplementary material for: Machine learning methods can replace 3D profile method in classification of amyloidogenic hexapeptides
Source: PubMed Central journal article supplement (PMC3566972; doi:10.1186/1471-2105-14-21), 2013-01-17
Supplement: 1471-2105-14-21-S2.pdf [file 1471-2105-14-21-S2.pdf]

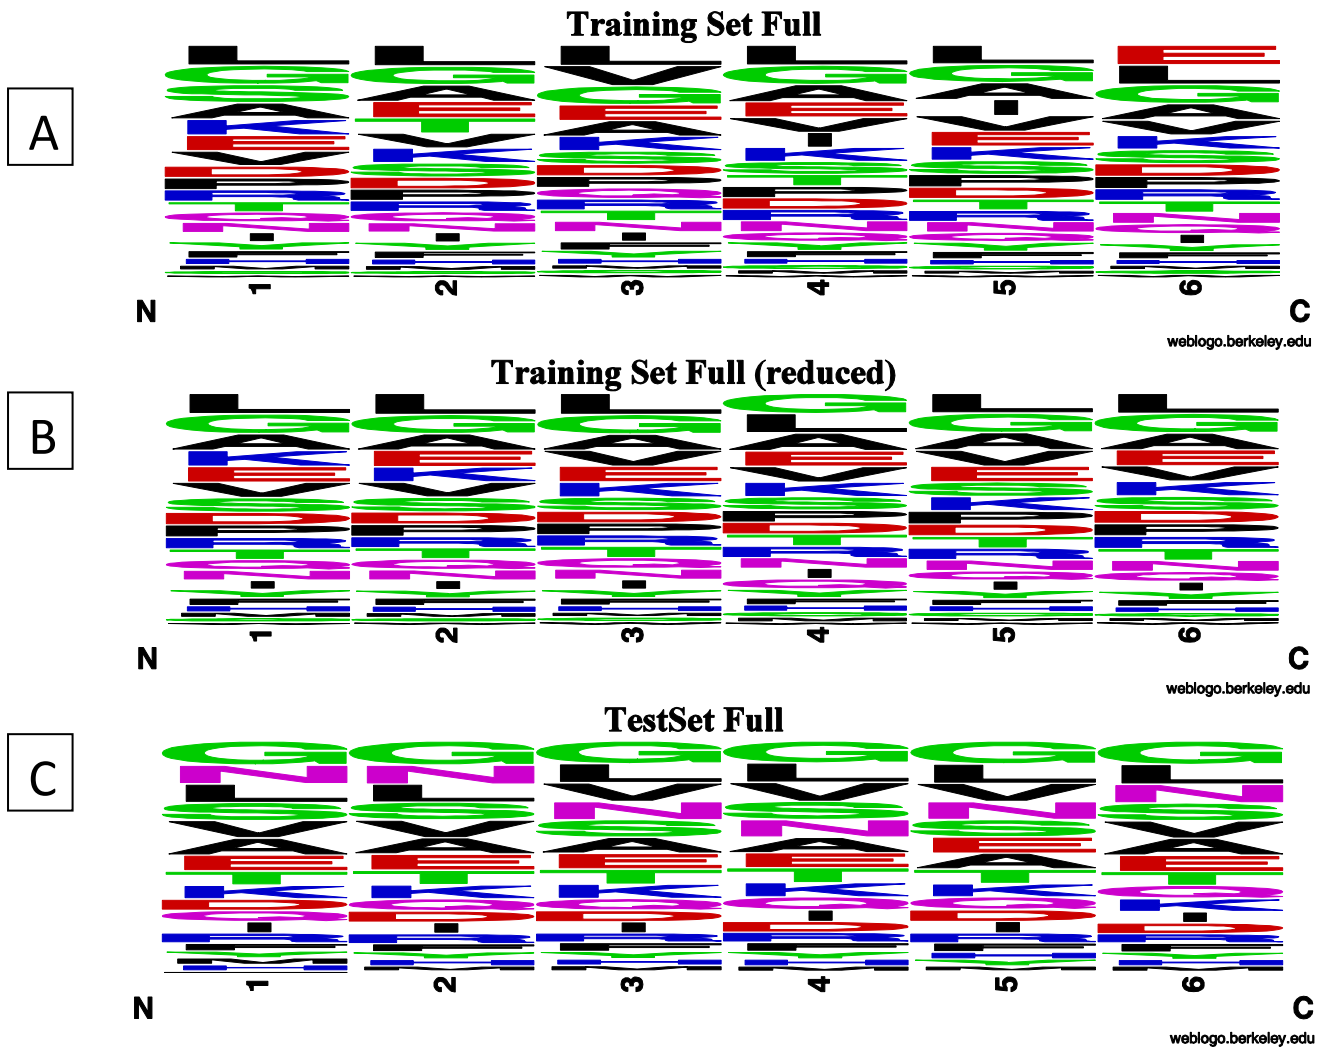

Fig.1\_File2. Frequencies of aminoacids at each position of 6-residue sequences

| position | 1   | 2   | 3   | 4   | 5   | 6   | stdev |
|----------|-----|-----|-----|-----|-----|-----|-------|
| K        | 1.3 | 1.2 | 1.2 | 1.1 | 1.1 | 1.2 | 0.1   |
| R        | 0.9 | 0.9 | 0.9 | 0.9 | 0.9 | 0.9 | 0.0   |
| D        | 1.0 | 1.0 | 0.9 | 0.9 | 0.9 | 1.0 | 0.0   |
| E        | 1.1 | 1.1 | 1.1 | 1.1 | 1.1 | 1.4 | 0.1   |
| N        | 1.1 | 1.1 | 1.1 | 1.2 | 1.1 | 1.2 | 0.0   |
| Q        | 1.1 | 1.2 | 1.2 | 1.1 | 1.1 | 1.2 | 0.1   |
| P        | 1.1 | 1.1 | 1.0 | 1.1 | 1.1 | 1.1 | 0.0   |
| H        | 1.3 | 1.3 | 1.2 | 1.2 | 1.1 | 1.1 | 0.1   |
| M        | 0.9 | 0.9 | 0.9 | 0.8 | 0.8 | 0.8 | 0.1   |
| C        | 1.5 | 1.4 | 1.6 | 1.8 | 1.7 | 1.6 | 0.1   |
| S        | 1.2 | 0.9 | 0.9 | 0.8 | 0.9 | 0.9 | 0.1   |
| T        | 0.8 | 1.2 | 0.8 | 0.9 | 0.9 | 0.9 | 0.1   |
| F        | 0.8 | 0.9 | 0.9 | 0.8 | 0.8 | 0.8 | 0.0   |
| W        | 1.1 | 1.1 | 1.4 | 1.3 | 1.2 | 1.3 | 0.1   |
| Y        | 1.2 | 1.2 | 1.1 | 1.2 | 1.3 | 1.1 | 0.1   |
| V        | 0.9 | 0.9 | 1.3 | 1.0 | 1.0 | 1.0 | 0.1   |
| L        | 0.9 | 0.9 | 0.9 | 0.9 | 0.8 | 0.9 | 0.0   |
| I        | 0.7 | 0.7 | 0.7 | 1.1 | 1.2 | 0.7 | 0.2   |
| G        | 1.2 | 1.1 | 1.2 | 1.2 | 1.1 | 1.2 | 0.0   |
| A        | 0.8 | 0.8 | 0.8 | 0.9 | 0.8 | 0.8 | 0.0   |
| stdev    | 0.2 | 0.2 | 0.2 | 0.2 | 0.2 | 0.2 | 0.2   |
|          |     |     |     |     |     |     | 0.1   |

| position | 1   | 2   | 3   | 4   | 5   | 6   | stdev |
|----------|-----|-----|-----|-----|-----|-----|-------|
| K        | 1.1 | 1.1 | 1.2 | 1.1 | 1.1 | 1.0 | 0.0   |
| R        | 0.8 | 0.8 | 0.8 | 0.8 | 0.8 | 0.7 | 0.0   |
| D        | 0.9 | 0.9 | 0.9 | 0.9 | 0.9 | 0.9 | 0.0   |
| E        | 1.1 | 1.1 | 1.1 | 1.0 | 1.1 | 1.1 | 0.0   |
| N        | 2.0 | 2.0 | 1.9 | 1.8 | 1.9 | 2.0 | 0.1   |
| Q        | 1.2 | 1.3 | 1.3 | 1.4 | 1.4 | 1.4 | 0.1   |
| P        | 0.0 | 0.0 | 0.0 | 0.0 | 0.0 | 0.0 | 0.0   |
| H        | 1.3 | 1.3 | 1.3 | 1.4 | 1.4 | 1.3 | 0.1   |
| M        | 1.2 | 0.9 | 1.0 | 0.9 | 0.9 | 0.9 | 0.1   |
| C        | 0.4 | 0.4 | 0.5 | 0.5 | 0.5 | 0.6 | 0.1   |
| S        | 1.2 | 1.1 | 1.1 | 1.2 | 1.1 | 1.1 | 0.0   |
| T        | 1.1 | 1.1 | 1.2 | 1.1 | 1.1 | 1.1 | 0.0   |
| F        | 0.8 | 0.8 | 1.0 | 1.0 | 1.0 | 1.0 | 0.1   |
| W        | 0.8 | 0.7 | 0.7 | 0.6 | 0.6 | 0.5 | 0.1   |
| Y        | 1.0 | 1.1 | 1.0 | 1.1 | 1.0 | 1.0 | 0.0   |
| V        | 1.1 | 1.1 | 1.2 | 1.2 | 1.2 | 1.1 | 0.0   |
| L        | 0.8 | 0.8 | 0.8 | 0.8 | 0.8 | 0.8 | 0.0   |
| I        | 0.8 | 0.8 | 0.8 | 0.8 | 0.8 | 0.8 | 0.0   |
| G        | 1.5 | 1.5 | 1.4 | 1.3 | 1.4 | 1.4 | 0.1   |
| A        | 0.9 | 0.8 | 0.8 | 0.8 | 0.8 | 0.9 | 0.0   |
| stdev    | 0.4 | 0.4 | 0.4 | 0.4 | 0.4 | 0.4 | 0.4   |
|          |     |     |     |     |     |     | 0.0   |

Tab.1\_File2. Frequencies of aminoacids at each position of 6-residue sequences, normalized by mean frequencies from UniProt. Training (left) and test (right) datasets do not show position dependence of aminoacids, although some frequencies of aminoacids slightly differ from those calculated by UniProt (e.g. prolines are excluded in the test set). Standard deviations are negligible.

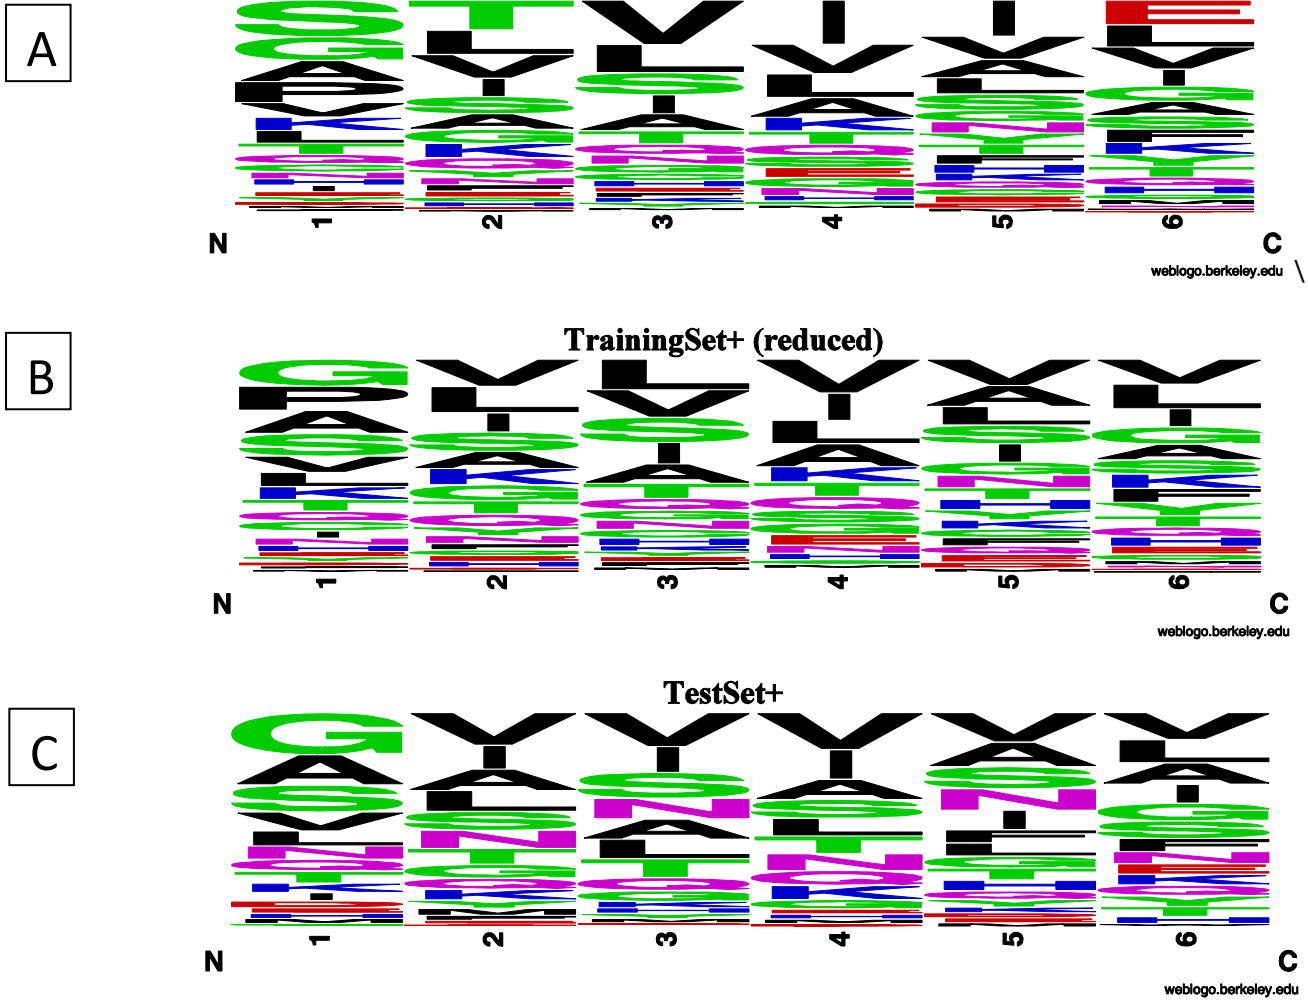

**Fig.2\_File2.** Logo representations of aminoacid frequencies for amylo-positive computational (training, testing) and experimental datasets. Colors are the same as in Fig1\_File2.

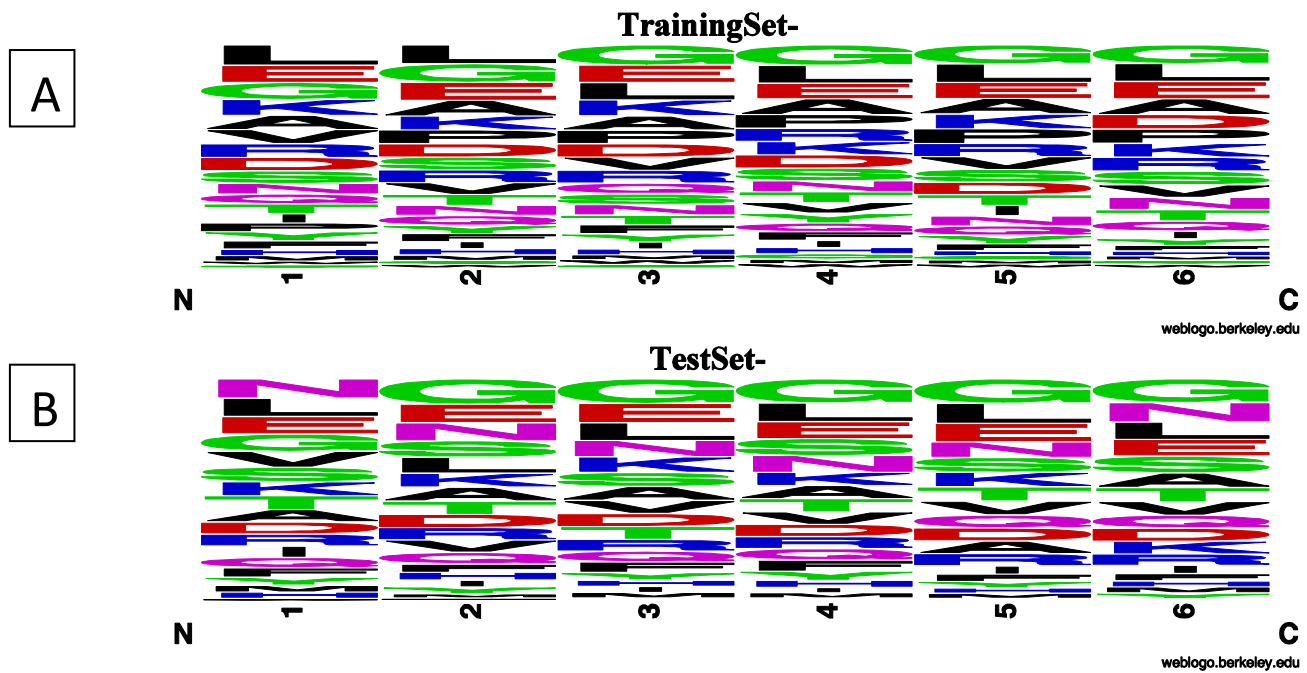

**Fig.3\_File2.** Logo representations of aminoacid frequencies for amylo-negative computational (training, testing) .
